# Supplementary material for: Atypical Functional Connectivity During Unfamiliar Music Listening in Children With Autism
Source: Front Neurosci. 2022 Apr 19;16:829415. doi: 10.3389/fnins.2022.829415 (PMC9063167; doi:10.3389/fnins.2022.829415)
Supplement: Supplementary file 2 [file Table_2.DOCX]

Supplementary Material

Atypical Functional Connectivity during Unfamiliar Music Listening in Children with Autism

**Carina Freitas1,2*****, Benjamin A. E. Hunt3,4, Simeon Wong3,4, Leanne Ristic2, Susan Fragiadakis2, Stephanie Chow2, Alana Iaboni2, Jessica Brian2,5, Latha Soorya6, Joyce Chen7, Russell Schachar8, Benjamin Dunkley3,4, Margot J. Taylor1,3,4,9, Jason P. Lerch4,10, 11, Evdokia Anagnostou1,2,4,5**

*** Correspondence:** Carina Freitas: [carina.debarrosfreitas@mail.utoronto.ca](mailto:carina.debarrosfreitas@mail.utoronto.ca)

**Supplementary Table 2: List of unfamiliar songs used in this study**

| **N** | **Name of the song** | **Artist** | **Nationality** | **Language lyrics** | **Genre** | **Tempo (group)** | **Tempo** | **Mode (V)** | **Mode** |
| --- | --- | --- | --- | --- | --- | --- | --- | --- | --- |
| 1 | 1985 | Haken | English | English | Rock/metal | Moderate | 95 | 0.13 | Major |
| 2 | Dreaming Wild | Klahr & Kev | Swedish | English | Electronic | Moderate | 105 | 0.08 | Major |
| 3 | Jumbo [NCS Release] | Alex Skrindo | Danish | Instrumental | Electronic | Fast | 130 | -0.08 | Minor |
| 4 | Kick Out The Jams - | [The Portugal Japan](https://www.google.com/search?rlz=1C1GCEU_enCA821CA821&q=kick+out+the+jams+the+portugal+japan&stick=H4sIAAAAAAAAAOPgE-LRT9c3LDYwLU4ziy9R4tLP1TcwLK4oLknXUspOttLPLS3OTNYvSk3OL0rJzEuPT84pLS5JLbJKLCrJLC5ZxKqSnZmcrZBfWqJQkpGqkJWYWwxmFOQXlZSmJ-YARQoS8wD-XLqsZwAAAA&sa=X&ved=2ahUKEwj4oM6U3KPkAhVIMawKHdrNB_cQmxMoATACegQICRAL) | Japanese | English | Punk Rock | Moderate | 116 | -0.17 | Minor |
| 5 | Star Citizen Main Theme | Pedro Macedo | Portuguese | Instrumental | Orchestral | Fast | 131 | -0.08 | Minor |
| 6 | Walk on Water | Ira Losco | Maltese | English | Rap | Fast | 174 | -0.09 | Minor |
| 7 | Rock lobster | The B-52's. | American | English | New wave | Fast | 182 | -0.06 | Minor |
| 8 | 100Ms | Dave | British | English | Rap/hip hop | Moderate | 71 | -0.08 | Minor |
| 9 | 3 Wheel-ups | Kano | British | English | Rap/hip hop | Moderate | 76 | -0.12 | Minor |
| 10 | A little respect | Silence 4 | Portuguese | English | Pop | Moderate | 110 | 0.27 | Major |
| 11 | A million voices | Polina Gagarina | Russian | English | Pop | Fast | 139 | -0.05 | Minor |
| 12 | Agnus Dei | Pedro Macedo | Portuguese | Instrumental | Orchestral | Moderate | 100 | -0.27 | Minor |
| 13 | All I Have Is My Soul | Natascha St. Pier | French | English | Pop | Moderate | 95 | 0.16 | Major |
| 14 | Alphabet, Phonics Songs Beavers | Busy Beavers | American | English | Cartoons | Moderate | 111 | 0.08 | Major |
| 15 | Alquimia, segredo guardado | Carina Freitas | Portuguese | Instrumental | Classic | Fast | 153 | -0.02 | Minor |
| 16 | Amanecer | Edurne | Spanish | Spanish | Pop | Moderate | 85 | -0.19 | Minor |
| 17 | Another Life E | Afrojack, David Guetta | Dutch | English | Electronic | Fast | 145 | -0.01 | Minor |
| 18 | Atmosphere | Joy Division | English | English | Rock | Moderate | 115 | -0.07 | Major |
| 19 | Au printemps | Jacques Brel | Belgian | French | Pop | Moderate | 85 | 0.04 | Major |
| 20 | Automatic | Inverted Mountain Beats | Dutch | Instrumental | Electrohouse | Moderate | 118 | 0.25 | Major |
| 21 | Back to life | Mikkel Solnado | Portuguese | English | Pop rock | Fast | 128 | 0.14 | Major |
| 22 | Beautiful | Chip | English | English | Rap/hip hop | Moderate | 88 | -0.03 | Minor |
| 23 | Beauty Never Lies | Bojana Stamenov | Serbian | English | Pop | Moderate | 85 | -0.16 | Minor |
| 24 | Big Man +BB2:B136 | Hyperaptive | British | English | Rap | Moderate | 95 | -0.02 | Minor |
| 25 | Black Tears | Hands on approach | Portuguese | English | Pop | Fast | 135 | 0.26 | Major |
| 26 | Blink | Cascada | German | English | Dance/Techno | Fast | 128 | 0.09 | Major |
| 27 | Blood Red Sandman | [Lordi](https://www.youtube.com/channel/UCn5gK-xJtOxYHzubFazyCKQ) | Finnish | English | Hard rock | Fast | 124 | -0.01 | Major |
| 28 | Break of Day | Edurne | Spanish | English | Pop | Fast | 123 | -0.28 | Minor |
| 29 | Breathing Deeper | Shapov & MEG/NERAK | Russian | English | Electronic | Fast | 166 | 0.12 | Major |
| 30 | Bring it back | Catherine Russell | American | English | Jazz | Moderate | 74 | -0.03 | Major |
| 31 | Built To Last | HammerFall | Swedish | English | Hard rock | Moderate | 105 | 0.00 | Minor |
| 32 | Busy for me | Aurea | Portuguese | English | Jazz | Fast | 182 | 0.03 | Minor |
| 33 | Cancao de ninar | Se acalme | Brazilian | Instrumental | Cartoons | Moderate | 90 | 0.11 | Major |
| 34 | Carcassonne | George Brassens | French | French | Pop | Fast | 136 | -0.01 | Major |
| 35 | Champions | Mikkel Solnado | Portuguese | English | Pop | Moderate | 86 | -0.09 | Minor |
| 36 | Cosmic Energy - Progressive House Mix | Fluidified | Finnish | Instrumental | Electrohouse | Fast | 170 | 0.16 | Major |
| 37 | Cosmic Energy 2 - Progressive House Mix | Fluidified | Finnish | Instrumental | Electrohouse | Fast | 128 | 0.06 | Major |
| 38 | Daisy | EZ Special | Portuguese | English | pop/rock | Fast | 147 | 0.12 | Major |
| 39 | Da-ma abraco | Miguel Gameiro | Portuguese | Instrumental | Piano | Moderate | 95 | 0.22 | Major |
| 40 | Danca dos Passaros | Antonio Pinho | Portuguese | Classical music | classical | Fast | 182 | 0.24 | Major |
| 41 | Dangerous | Cascada | German | English | Dance/Techno | Fast | 145 | 0.03 | Major |
| 42 | Days of your own | Hands on approach | Portuguese | English | Pop | Fast | 122 | -0.10 | Minor |
| 43 | Do it | Fingertips | Portuguese | Instrumental | pop | Fast | 129 | 0.10 | Major |
| 44 | Dollar bill | Screaming Trees | American | English | Grunge | Moderate | 82 | 0.13 | Major |
| 45 | Driving all night | EZ Special | Portuguese | Instrumental | Pop/rock | Moderate | 114 | -0.04 | Major |
| 46 | Duerme Negrito | Mercedes Sosa | Spanish | Spanish | Pop/Folk | Moderate | 78 | -0.08 | Major |
| 47 | Earthrise | Haken | English | English | Rock/metal | Moderate | 89 | 0.08 | Major |
| 48 | Easy to See | Feminnem | Croatian | English | Pop | slow | 64 | 0.09 | Minor |
| 49 | El arriero | Atahualpa Yupanqui | Argentine | Spanish | Pop/Folk | Fast | 125 | -0.19 | Minor |
| 50 | El Run Run | Estopa | Spanish | Spanish | Pop | Moderate | 86 | 0.22 | Major |
| 51 | Euphoria | Loreen | Swedish | English | Pop | Fast | 176 | -0.17 | Minor |
| 52 | Evacuate the Dancefloor | Cascada | German | English | Dance/Techno | slow | 64 | -0.07 | Minor |
| 53 | Fairytale | Alexander Rybak | Norwegian | English | Ethnic | Moderate | 108 | -0.23 | Minor |
| 54 | Family | Chip feat Loick Essien | English | English | Rap/hip hop | Moderate | 80 | 0.23 | Major |
| 55 | Feeling myself | Chip | English | English | Rap/hip hop | Moderate | 95 | 0.06 | Major |
| 56 | Figurative Language | Pr2A | N.A. | English | Rap | Fast | 124 | -0.02 | Minor |
| 57 | First kiss | Alexander Rybak | Norwegian | English | Pop | slow | 71 | -0.26 | Minor |
| 58 | Flashbacks | Franco | Portuguese | English | Pop | Moderate | 120 | 0.24 | Major |
| 59 | Fly on the wings of love | Olsen Brothers | Dennish | English | Pop | Moderate | 104 | 0.13 | Major |
| 60 | Give Me The Night | George Benson | American | English | Funk | Moderate | 111 | 0.06 | Minor |
| 61 | Give Your Life For Rock And Roll | [Lordi](https://www.youtube.com/channel/UCn5gK-xJtOxYHzubFazyCKQ) | Finland | English | Rock/metal | Moderate | 107 | 0.04 | Major |
| 62 | Glorious | Cascada | German | English | Dance/Techno | Fast | 128 | 0.09 | Minor |
| 63 | Golden Boy | [Nadav Guedj](https://www.youtube.com/watch?v=NdxOCTezeTg) | Israelis | English | voice | Moderate | 83 | -0.17 | Minor |
| 64 | Goodbye to Yesterday | Elina Born & Stig Rasta | Estonian | English | Pop | Moderate | 94 | 0.03 | Minor |
| 65 | Gravity | Zlata Ognevich | Ukraine | English | Pop | Fast | 170 | -0.10 | Minor |
| 66 | Gulliver Little Man of the Year | Hanna-Barbera Productions | American | Instrumental | Cartoons | Moderate | 80 | -0.21 | Minor |
| 67 | Hard Rock Hallelujah | [Lordi](https://www.youtube.com/channel/UCn5gK-xJtOxYHzubFazyCKQ) | Finnish | English | Hard rock | Fast | 123 | -0.09 | Major |
| 68 | Head In The Clouds | Gazoon Cartoons | American | English | Cartoons | Fast | 121 | 0.13 | Major |
| 69 | Hear them calling | Greta Salome | Icelander | English | Voice, guitar | Moderate | 117 | -0.35 | Minor |
| 70 | Here For You | Maraaya | Slovenian | English | Pop | Moderate | 105 | 0.01 | Minor |
| 71 | Hero March | Pedro Macedo | Portuguese | Instrumental | Orchestral | Moderate | 106 | -0.11 | Minor |
| 72 | Heroes | Mans Zelmerlow | Swedish | English | Pop | Moderate | 83 | -0.22 | Minor |
| 73 | Hour of the Wolf | Elnur Huseynov | Azerbaijani | English | Pop | Moderate | 108 | 0.22 | Major |
| 74 | I Don't Remember Your Name | Friðrik Dór | Icelandic | English | Dance/Techno | Moderate | 113 | 0.11 | Major |
| 75 | I feel like John Travolta | EZ Special | Portuguese | English | pop/rock | Moderate | 92 | 0.03 | Major |
| 76 | I miss you | Franco | Portuguese | English | Pop | Moderate | 104 | 0.25 | Major |
| 77 | I really am such a fool | EZ Special | Portuguese | English | pop | Fast | 169 | -0.09 | Major |
| 78 | I Wanna | Maria N | Latvia | English | Pop/rock | Fast | 144 | -0.14 | Minor |
| 79 | Icebraker | Agnete | Norwegian | English | House music | Fast | 163 | 0.01 | Minor |
| 80 | I'd like to walk around in your mind | Vashti Bunyan | English | English | Folk | Fast | 127 | 0.22 | Major |
| 81 | Igneous | Moon Tooth | American | Instrumental | Metal | Fast | 125 | -0.09 | Major |
| 82 | I'll remember to forget | Rita Redshoes | Portuguese | English | pop | Moderate | 104 | 0.05 | Amb. |
| 83 | I'm alive | Ethaide | Albanian | English | Ethnic | Moderate | 103 | -0.04 | Minor |
| 84 | I'm fine | Chip feat. Stormzy & Shalo | English | English | Rap/hip hop | Fast | 169 | -0.02 | Minor |
| 85 | I'm on the road to happiness | Rita Redshoes | Portuguese | English | Pop | slow | 69 | -0.01 | Major |
| 86 | In Front Of Your Eyes | [Garmiani](https://www.youtube.com/channel/UCwtzJXj2PLcu-tw6GcZQG3w) | Swedish | English | Electronic | Fast | 125 | 0.00 | Minor |
| 87 | In love with U | EZ Special | Portuguese | English | pop/rock | Fast | 135 | 0.05 | Major |
| 88 | In My Place | Ana Free | Portuguese | Instrumental | Pop | Moderate | 97 | -0.20 | Minor |
| 89 | In n'Out | EZ Special | Portuguese | English | pop/rock | slow | 121 | -0.03 | Major |
| 90 | In the Air | Chipmunk feat Keri Hilson | English | English | Rap/hip hop | Moderate | 85 | -0.10 | Minor |
| 91 | In your eyes | Niamh Kavan | Irish | English | Pop | Fast | 129 | -0.09 | Minor |
| 92 | Integration I for two pianos | Pedro Macedo | Portuguese | Instrumental | Classic | Fast | 138 | 0.10 | Major |
| 93 | Jungle 81 | Rita Redshoes | Portuguese | English | Pop | slow | 63 | -0.09 | Minor |
| 94 | Kiss me, oh kiss me | David Fonseca | Portuguese | English | Pop | Moderate | 103 | -0.24 | major |
| 95 | Le Gorille | Georges Brassens | French | French | Pop | Fast | 124 | 0.00 | Major |
| 96 | Le Petit Cheval Blanc | Georges Brassens | French | French | Pop | Fast | 125 | 0.05 | Major |
| 97 | Les bonbons | Jacques Brel | Belgian | French | Pop | Moderate | 77 | -0.02 | Major |
| 98 | Les vieux | Jacques Brel | Belgian | French | Pop | Moderate | 72 | 0.26 | Major |
| 99 | Let's be in love | Hands on approach | Portuguese | English | Pop | slow | 76 | -0.03 | Major |
| 100 | Lighthouse | Nina Kraljić | Croatian | English | Rock | Moderate | 77 | 0.14 | Major |
| 101 | Live in Peace | One Love Family | Portuguese | English | Reggae | Fast | 133 | 0.01 | Major |
| 102 | Lolek und Bolek - Die Armbrust | N. A. | Polish | Instrumental | Cartoons | Fast | 133 | 0.21 | Major |
| 103 | Lordi Devil Is A Loser | [Lordi](https://www.youtube.com/channel/UCn5gK-xJtOxYHzubFazyCKQ) | Finnish | English | Heavy Rock | Moderate | 73 | -0.02 | Minor |
| 104 | Los ejes de mi carreta | Atahualpa Yupanqui | Argentine | Spanish | Pop/Folk | Moderate | 119 | -0.29 | Minor |
| 105 | Love injected | Aminata | Latvian | English | House music | Fast | 144 | 0.07 | Major |
| 106 | Love is | Katrina Elam | American | English | Country | Slow | 72 | 0.12 | Major |
| 107 | Magical | Nina | Serbian | English | Pop | Moderate | 92 | 0.18 | Major |
| 108 | Malabares | Estopa | Spanish | Spanish | Pop | Moderate | 111 | -0.19 | Minor |
| 109 | Marble Machine | Wintergatan | Swedish | Instrumental | New Age | Moderate | 98 | 0.24 | Major |
| 110 | Maya the Bee | Karel Svoboda | German | English | Cartoons | Fast | 124 | 0.30 | Major |
| 111 | Megadeth - Tornado of Souls (HD).wav' | Megadeth | American | English | Heavy Metal | Moderate | 79 | -0.25 | Major |
| 112 | Message to my girl | Split Enz | New Zealander | English | Rock | Moderate | 104 | -0.06 | Major |
| 113 | Moskau | Dschinghis Khan | German | German | Disco | Fast | 131 | 0.17 | Major |
| 114 | Move Faster | Fingertips | Portuguese | Instrumental | Pop | Fast | 127 | -0.16 | Minor |
| 115 | Music For Monetize | Joseespirit | N.A. | English | Progressive House | Fast | 128 | -0.06 | Minor |
| 116 | Musica Para Bebe Dormir | Cassio Toledo | N.A. | Instrumental | Cartoons | Moderate | 87 | 0.02 | Major |
| 117 | My number one | Helena Paparizou | Greek | English | Pop | Fast | 151 | -0.22 | Minor |
| 118 | My Own Beat | Leonar Andrade | Portuguese | English | Pop/rock | Moderate | 112 | -0.16 | Minor |
| 119 | My wonder moon | Hands on approach | Portuguese | English | Pop rock | Fast | 137 | 0.21 | Major |
| 120 | New Way to Go | Birgit | Estonian | English | Pop | Moderate | 72 | 0.15 | Major |
| 121 | No limits | Franco | Portuguese | English | Reggae | Fast | 175 | 0.20 | Major |
| 122 | No, No, Never | Texas Lightning | German | English | Pop | Moderate | 121 | 0.14 | Minor |
| 123 | Northern lights | Kate Boy | Swedish | English | Electropop | Moderate | 97 | 0.04 | Major |
| 124 | Numbers Counting Baby Songs, Nursery Rhymes | Busy Beavers | American | English | Cartoons | Moderate | 95 | 0.12 | Major |
| 125 | Oblivion | Tavram | N.A. | Instrumental | Electrohouse | Moderate | 99 | 0.09 | Major |
| 126 | Once Again | Friðrik Dór | Icelandic | English | Pop | slow | 65 | 0.16 | Minor |
| 127 | One For Me | ByeAlex | Hungarian | English | Pop | Fast | 161 | 0.07 | Major |
| 128 | Only teardrops | Emmelie de Forest | Danish | English | Pop/Ethnic | Moderate | 111 | -0.14 | Minor |
| 129 | OPA! | Giorgos Alkaios & Friends | Greek | English | Ehtnic | Fast | 121 | -0.10 | Minor |
| 130 | Paisley | The Holydrug Couple | Chilean | English | Pop | Fast | 180 | 0.06 | Major |
| 131 | Para Llenarme De Ti | Ramón | Spanish | Spanish | Latin pop | Moderate | 102 | -0.22 | Minor |
| 132 | Pass Out | Tinie Tempah | British | English | Rap/hip hop | Moderate | 99 | -0.05 | Minor |
| 133 | Pat a mat | Lubomír Beneš | Czechoslovak | Instrumental | Cartoons | Moderate | 90 | 0.17 | Major |
| 134 | Picture of my own | Fingertips | Portuguese | Instrumental | Pop | Moderate | 123 | -0.04 | Minor |
| 135 | Planquez-vous | Keny Arkana | Argentine-French | French | Rap | Fast | 132 | -0.15 | Minor |
| 136 | Prendimi | Giovanni Allevi | Italian | Instrumental | Classical | Fast | 127 | 0.33 | Major |
| 137 | Professor Balthazar - Opening | Zlatko Grgić | Croatian | Instrumental | Cartoons | Fast | 144 | 0.13 | Major |
| 138 | Psych Out! | Garage Psyché | N.A. | English | Punk Rock | Fast | 128 | 0.31 | Major |
| 139 | Real | Of Mice and Men | American | English | Rock | Moderate | 113 | 0.05 | Major |
| 140 | Reksio - dog from Poland | Zenon Kowalowski | Polish | Instrumental | Cartoons | Fast | 137 | 0.02 | Major |
| 141 | Remember Afro House Music | DJ Manja | Portuguese | English | House music | Fast | 171 | 0.20 | Major |
| 142 | Rhythm inside | Lic Nottet | Belgium | English | Pop | Fast | 178 | -0.10 | Minor |
| 143 | Rise like a Phoenix | Conchita Wurst | Austrian | English | Pop Opera | Fast | 147 | -0.04 | Minor |
| 144 | Rumba Portuguesa | Intensa Music | Portuguese | English | Dance/Electronic | Fast | 171 | 0.07 | Major |
| 145 | Run Away | Sunstroke Project & Olia Tira | Moldovan | English | Rap | Fast | 130 | -0.03 | Minor |
| 146 | Russian Electro House 2013 Mix 70 | DJ Team Steve Strife & JayJay | Russian | Instrumental | Electrohouse | Fast | 135 | -0.05 | Minor |
| 147 | Safety dance | Men Without Hats | Canadian | English | New wave | Moderate | 106 | -0.03 | Major |
| 148 | Satellite | Lena Mayer-Landrut | German | English | Pop | Fast | 167 | -0.02 | Major |
| 149 | Scenario | A Tribe Called Quest | American | English | Rap | Fast | 169 | -0.09 | Minor |
| 150 | Sky | Alan Walker Alex Skrindo | Norwegian | Instrumental | Electronic | Fast | 130 | -0.16 | Minor |
| 151 | Snow On the Sahara | Anggun | French | English | Pop | Moderate | 112 | -0.15 | Minor |
| 152 | Some People | Shapov & Beverly Pills | Russian | English | Electronic | Fast | 122 | 0.03 | Major |
| 153 | Someone that cannot love | David Fonseca | Portuguese | English | Pop | Moderate | 103 | 0.32 | minor |
| 154 | Song from a secret garden | Cascada | German | English | Dance/Techno | Fast | 128 | 0.09 | Minor |
| 155 | Song from a secret garden | Alexander Rybak | Norwegian | English | Classic | Moderate | 118 | -0.23 | Minor |
| 156 | Starfarer (Youre the one for me | Pedro Macedo | Portuguese | Instrumental | Orchestral | Moderate | 90 | -0.14 | Minor |
| 157 | Start It Over | Club Dogo ft Cris Cab | Italian | English /Italian | Rap | Slow | 79 | -0.06 | Minor |
| 158 | Still in Love With You | Electro Velvet | British | English | Dance/Techno | Moderate | 117 | -0.14 | Minor |
| 159 | Storm pill | Moon Tooth | American | English | Metal | Fast | 185 | 0.00 | Minor |
| 160 | Sunlight | Nicky Byrne | Irish | English | Pop dance | Fast | 125 | 0.10 | Major |
| 161 | Sunshine | Vaquero | Spanish | English | Pop | Fast | 125 | 0.24 | Major |
| 162 | Suus | Rona Nishliu | Albanian | English | Jazz | Fast | 174 | -0.38 | Minor |
| 163 | Swallow my pride | Green River | American | English | Grunge | Moderate | 87 | 0.09 | Minor |
| 164 | Swing, brother, swing! | Catherine Russell | American | English | Jazz | Moderate | 110 | -0.19 | Minor |
| 165 | Tainted love | Soft Cell | British | English | Electronic | Fast | 145 | -0.02 | Major |
| 166 | Take me to your heaven | Charlotte Nilsson | Swiss | English | Pop/rock | Fast | 145 | 0.11 | Major |
| 167 | Talkin 'bout money | Fred the Godson | American | English | Rap | Moderate | 85 | -0.25 | Minor |
| 168 | Teenage Life | Daz Sampson | British | English | Rap | Fast | 180 | 0.16 | Major |
| 169 | Tennessee Tuxedo Theme song | [W. Watts Biggers](https://en.wikipedia.org/wiki/W._Watts_Biggers) | American | Instrumental | Cartoons | Fast | 140 | -0.02 | Major |
| 170 | The beginning song | Rita Redshoes | Portuguese | English | Pop | Fast | 140 | -0.09 | Minor |
| 171 | The Endless Knot | Haken | English | English | Rock/metal | Moderate | 80 | -0.18 | Minor |
| 172 | The Great Grape Ape Show | Hanna-Barbera Productions | American | Instrumental | Cartoons | Fast | 121 | -0.05 | Minor |
| 173 | The Inspector Main Theme | Henry Mancini | American | Instrumental | Cartoons | Fast | 126 | 0.22 | Major |
| 174 | The Mind's Eye | Haken | English | English | Rock | Fast | 131 | 0.22 | Major |
| 175 | The Terrorist | Dj Vadim | Russian | English | Rap/hip hop | Moderate | 105 | -0.03 | Minor |
| 176 | The Voice | Eimear Quinn | Irish | English | Ethnic/ folk | Moderate | 94 | -0.11 | Minor |
| 177 | The World Is Yours | Arch Enemy | Swedish | English | Hard rock | Fast | 185 | -0.06 | Minor |
| 178 | This Child | Kings Of Spade | American | English | Rock | Moderate | 104 | 0.00 | Major |
| 179 | Tiger Boo - English Version | Jamstar Records | American | English | Cartoons | Fast | 182 | -0.18 | Minor |
| 180 | Time | Work Drugs | American | English | Electropop | Moderate | 89 | 0.07 | Major |
| 181 | Time to Shine | Melanie Reneu | Swiss | English | Pop | Fast | 144 | -0.05 | Minor |
| 182 | Tonight again | Guy Sebastian | Australian | English | Pop | Moderate | 73 | -0.15 | Minor |
| 183 | T-shirt Weather In The Manor | Kano | British | English | Rap/hip hop | Moderate | 99 | -0.02 | Minor |
| 184 | Unbroken | Maria Olafsdottir | Icelandic | English | Pop | Fast | 188 | 0.06 | Major |
| 185 | Vilas Morenas | Antonio Pinho | Portuguese | Instrumental | classical | Moderate | 109 | -0.04 | Minor |
| 186 | Wars for Nothing | Magyar Felirat | Hungarian | English | Pop | Moderate | 88 | 0.10 | Minor |
| 187 | We Are One | One Love Family | Portuguese | English | Reggae | Fast | 164 | 0.00 | Major |
| 188 | We Are Slavic | Donatan Cleo | Polish | English | Rap | Fast | 156 | -0.11 | Minor |
| 189 | We can do anything | Gabriel | Portuguese | English | Pop | Moderate | 82 | -0.25 | Minor |
| 190 | We Could Be The Same | maNga | Turkish | English | Rock | Fast | 133 | -0.13 | Minor |
| 191 | White Lies | Rita Redshoes | Portuguese | English | Pop | Moderate | 115 | 0.11 | Major |
| 192 | Witcher 3 Main Theme | Pedro Macedo | Portuguese | Instrumental | Orchestral | Moderate | 111 | -0.12 | Minor |
| 193 | Woman, snake | Rita Redshoes | Portuguese | English | pop/progressive | Moderate | 88 | -0.03 | Minor |
| 194 | Won't let you go | Franco | Portuguese | English | Pop | Moderate | 106 | 0.15 | Major |
| 195 | Yodel It | Ilinca ft Alex Florea | Romania | English | Rap | Moderate | 87 | 0.29 | Major |
| 196 | You're gone | Fingertips | Portuguese | English | Pop | slow | 62 | 0.21 | Major |

Tempo groups: slow (40 to 72 bpm), moderate (72 to 120 bpm) and fast (120 to 208 bpm); bpm – beats per minute; Mode (v) – value given for the mode by the MIR toolbox software; N.A. - not available.
